# Supplementary material for: Synthesis, structure and magnetic ordering of the mullite-type Bi2Fe4−xCrxO9solid solutions with a frustrated pentagonal Cairo lattice
Source: Royal Society of Chemistry journal article supplement (doi:10.1039/c5dt04296h), 2015-11-30
Supplement: c5dt04296h2.pdf [file c5dt04296h2.pdf]

## Supplementary Information

Synthesis, structure and magnetic ordering of the mullite-type  $\text{Bi}_2\text{Fe}_{4-x}\text{Cr}_x\text{O}_9$  solid solutions with frustrated pentagonal Cairo lattice.

M. G. Rozova, V. V. Grigoriev, I. A. Bobrikov, D. S. Filimonov, K. V. Zakharov, O. S. Volkova, A. N. Vasiliev, E. V. Antipov, A. A. Tsirlin, A. M. Abakumov

Table S1. 298K and 78K  $^{57}\text{Fe}$  Mössbauer hyperfine parameters for  $\text{Bi}_2\text{Fe}_3\text{CrO}_9$ . (IS, isomer shift relative to  $\alpha\text{-Fe}$  at ambient temperature;  $\Delta E_Q$ , apparent quadrupole shift;  $H_{\text{Hf}}$ , magnetic hyperfine field; G, line width; A, relative spectral area)

| T, K | Component | IS,<br>mm/s<br>$\pm 0.01$ | $\Delta E_Q$ ,<br>mm/s<br>$\pm 0.01$ | $H_{\text{Hf}}$ , T<br>$\pm 0.1$ | A<br>%<br>$\pm 1$ | G,<br>mm/s<br>$\pm 0.01$ | Assignment                  |
|------|-----------|---------------------------|--------------------------------------|----------------------------------|-------------------|--------------------------|-----------------------------|
| 298  | S1        | 0.37                      | -0.21                                | 50.7                             | 8                 | 0.44                     | $\text{Fe}_2\text{O}_3$ imp |
|      | D1        | 0.35                      | 0.38                                 | -                                | 31                | 0.26                     | $\text{Fe}^{3+}$ (oct)      |
|      | D2        | 0.24                      | 0.99                                 | -                                | 61                | 0.31                     | $\text{Fe}^{3+}$ (tet)      |
| 78   | S11       | 0.46                      | -0.14                                | 53.1                             | 4                 | 0.36                     | $\text{Fe}_2\text{O}_3$ imp |
|      | S21       | 0.45                      | 0                                    | 47.2                             | 31                | 0.57                     | $\text{Fe}^{3+}$ (oct)      |
|      | S22       | 0.32                      | 0.38                                 | 43.0                             | 60                | 0.53                     | $\text{Fe}^{3+}$ (tet)      |
|      | S31       | 0.36                      | 0.1                                  | 7.6                              | 5                 | 0.52                     | $\text{Fe}^{3+}$ (avr)      |

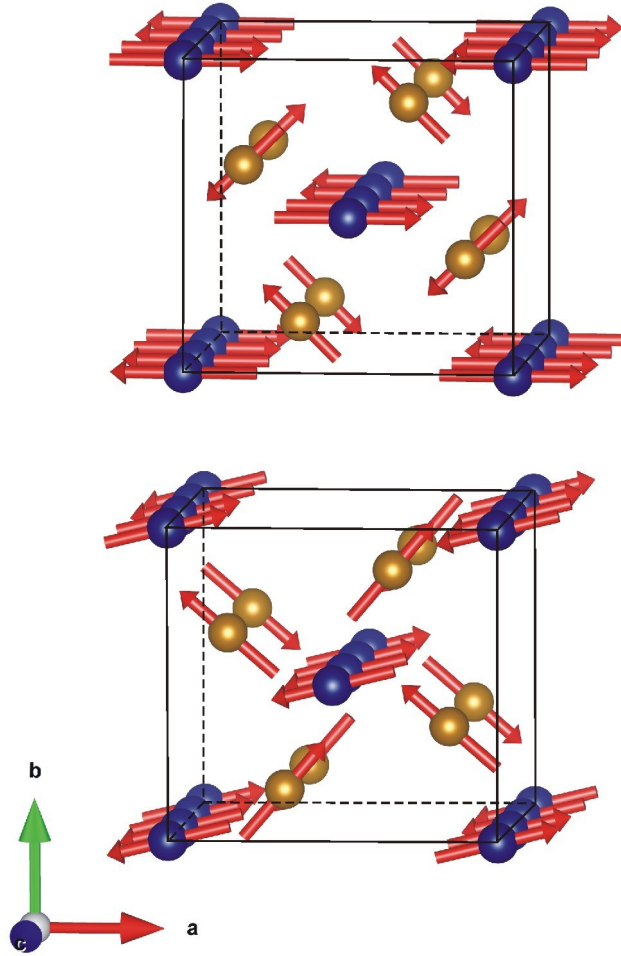

Figure S1. Variants of the  $\text{Bi}_2\text{Fe}_3\text{CrO}_9$  magnetic structure with the magnetic moments confined to  $ab$  plane. The Fe1 and Fe2 sublattices are marked in yellow and blue, respectively. The structure is shown in the  $a, b, 2c$  unit cell, where  $a, b, c$  are the lattice parameters of the nuclear structure.

Table S2. Symmetry operators of the  $F_a\bar{1}$  magnetic space group (S.G.  $P_S\bar{1}$  (#2.7) in Belov-Neronova-Smirnova notations).

| Seitz symbol                                                                                                     | Symmetry operator | Seitz symbol                 | Symmetry operator    |
|------------------------------------------------------------------------------------------------------------------|-------------------|------------------------------|----------------------|
| $(\bar{1} 0,0,0)$                                                                                                | $x, y, z, m$      | $(\bar{1} 0,0,\frac{1}{2})'$ | $x, y, z+1/2, -m$    |
| $(\bar{1} 0,0,0)$                                                                                                | $-x, -y, -z, m$   | $(\bar{1} 0,0,\frac{1}{2})'$ | $-x, -y, -z+1/2, -m$ |
| $+(\bar{1} 0,\frac{1}{2},\frac{1}{2}), (\bar{1} \frac{1}{2},0,\frac{1}{2}), (\bar{1} \frac{1}{2},\frac{1}{2},0)$ |                   |                              |                      |

Table S3. Fractional coordinates of the magnetic atoms in the magnetic supercell (magn. S.G.  $F_a\bar{1}$ ,  $a = 15.8982(3)\text{\AA}$ ,  $b = 16.7673(3)\text{\AA}$ ,  $c = 11.9520(2)\text{\AA}$ ,  $R_{\text{magn}} = 0.014$ ,  $R_{\text{p}} = 0.013$ ,  $R_{\text{wp}} = 0.014$ ) and magnetic moments in spherical coordinates ( $\mu, \theta, \varphi$ ) at  $T = 30\text{K}$ .

| Atom             | $x/a$   | $y/b$  | $z/c$  | $\mu$ , $\mu\text{B}$ | $\theta$ , deg.              | $\varphi$ , deg.               |
|------------------|---------|--------|--------|-----------------------|------------------------------|--------------------------------|
| Fe1 <sub>1</sub> | -0.8239 | 0.1677 | 1/4    | 3.40(3)               | 51(1)                        | 140(2)                         |
| Fe1 <sub>2</sub> | -0.5739 | 0.0823 | 1/4    | $\mu(\text{Fe1}_1)$   | $\theta(\text{Fe1}_1)$       | $-270 + \varphi(\text{Fe1}_1)$ |
| Fe2 <sub>1</sub> | 0       | 1/4    | 0.3746 | $\mu(\text{Fe1}_1)$   | $180 - \theta(\text{Fe1}_1)$ | -111(2)                        |
| Fe2 <sub>2</sub> | 3/4     | 0      | 0.6254 | $\mu(\text{Fe1}_1)$   | $180 - \theta(\text{Fe1}_1)$ | $180 + \varphi(\text{Fe2}_1)$  |

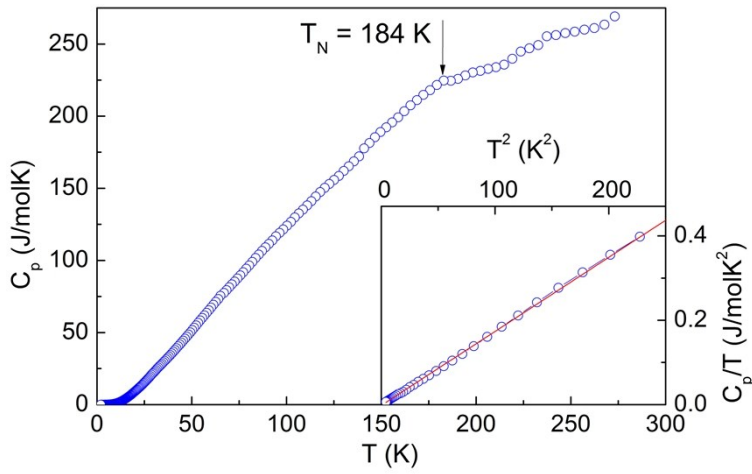

Figure S2. Temperature dependence of heat capacity for  $\text{Bi}_2\text{Fe}_3\text{CrO}_9$ . The insert shows fitting the low temperature part with the  $C_p/T - \alpha T^2$  Debye dependence.
